# Supplementary material for: Humming hummingbirds, insect flight tones, and a model of animal flight sound
Source: Oxford University Press journal article supplement (doi:10.1242/jeb.214965), 2020-01-01
Supplement: jeb214965supp.pdf [file jeb214965supp.pdf]

Table S1: Empirical measurements of sound pressure levels of animal wings

| Species                                                      | WBF (Hz) | Mass      | Amplitude (dB SPL)   | Distance (m) | Nearfield-farfield transition $n = 1) (\lambda/2\pi)$ (m) | Predicted nearfield SPL in Z (dB) | Orientation | condition                   | reference                      |
|--------------------------------------------------------------|----------|-----------|----------------------|--------------|-----------------------------------------------------------|-----------------------------------|-------------|-----------------------------|--------------------------------|
| <b>Mosquito</b><br>( <i>Aedes aegypti</i> )                  | 721, 514 | 1 or 5 mg | 60-75 SPVL (Fig. 6A) | 0.01         | 0.075, 0.10                                               | 52-65 dB SPL <sup>1</sup>         | X, Y, Z     | Tethered                    | (Arthur et al., 2014)          |
| <b>Caribbean Fruit Fly</b><br>( <i>Anastrepha suspensa</i> ) | 157      | 78 mg     | 74                   | 0.0127       | 0.34                                                      | 85                                | Z           | tethered                    | (Webb et al., 1976)            |
| <b>Honeybee</b><br>( <i>Apis mellifera</i> )                 | 250      | 100 mg    | 73                   | 0.015        | 0.22                                                      | 84 dB                             | Not stated  | waggle dance (on substrate) | (Michelsen et al., 1986; 1987) |
| <b>Costa's Hummingbird</b>                                   | 37       | 3 g       | 70.5                 | 0.21         | 1.46                                                      | 68.5                              | X, Y,Z      | Free flight                 | This study                     |

|                                                                     |      |           |                   |                      |      |      |            |                                         |                           |
|---------------------------------------------------------------------|------|-----------|-------------------|----------------------|------|------|------------|-----------------------------------------|---------------------------|
| <b>Barn Owl</b><br>( <i>Tyto alba</i> )                             | 4    | 0.3 kg    | 93.5 ± 4.9        | 0.6 ± 13.5<br>0.25 m |      | 90.2 | Z          | Forward flight (2.5 m s <sup>-1</sup> ) | (LePiane and Clark, 2020) |
| <b>Barn Owl</b><br>( <i>Tyto alba</i> )                             | 3.3  | Not given | 64-85             | 0.5                  | 16.2 |      | Z          | Takeoff                                 | (Boonman et al., 2018)    |
| <b>Pigeon</b><br>( <i>Columba livia</i> )                           | 9.4  | 232g      | 67.3 <sup>2</sup> | 1                    | 5.7  | 79.1 | Not stated | Free flight                             | (Boonman et al., 2020)    |
| <b>Common Myna</b><br>( <i>Acridotheres tristis</i> )               | 12.1 | 112g      | 59.5 <sup>2</sup> | 1                    | 4.4  | 72.8 | Not stated | Free flight                             | (Boonman et al., 2020)    |
| <b>White-spectacled Bulbul</b><br>( <i>Pycnonotus xanthopygos</i> ) | 12.3 | 41g       | 53.8 <sup>2</sup> | 1                    | 4.4  | 64.1 | Not stated | Free flight                             | (Boonman et al., 2020)    |
| <b>House Sparrow</b><br>( <i>Passer domesticus</i> )                | 22.6 | 28.5g     | 56.0 <sup>2</sup> | 1                    | 2.4  | 60.9 | Not stated | Free flight                             | (Boonman et al., 2020)    |
| <b>Mouse-tailed bat</b><br>( <i>Rhinopoma</i> )                     | 10.8 | 28.4      | 45.6 <sup>2</sup> | 1                    | 5.0  | 60.9 | Not stated | Free flight                             | (Boonman et al., 2020)    |

| <i>microphyllum</i> )                               |      |       |                   |   |     |      |            |             |                        |  |
|-----------------------------------------------------|------|-------|-------------------|---|-----|------|------------|-------------|------------------------|--|
| <b>Big Brown Bat (<i>Eptesicus fuscus</i>)</b>      | 14.8 | 18.6  | 38.8 <sup>2</sup> | 1 | 3.7 | 57.2 | Not stated | Free flight | (Boonman et al., 2020) |  |
| <i>Rousettus bat (Rousettus aegyptiacus)</i>        |      |       |                   |   |     |      |            |             |                        |  |
| <b>Rousettus bat (<i>Rousettus aegyptiacus</i>)</b> | 8.3  | 168.5 | 45.6 <sup>2</sup> | 1 | 6.5 | 76.4 | Not stated | Free flight | (Boonman et al., 2020) |  |

<sup>1</sup> assuming impedance  $Z_0 = 413$  rayl

<sup>2</sup> Values are for amplitude scaled to a reference distance of 1 m, assuming nearfield scaling proportional to  $r^{-2}$ . Boonman et al. (2020)'s presented values assumed farfield scaling proportion to  $r^{-1}$ .

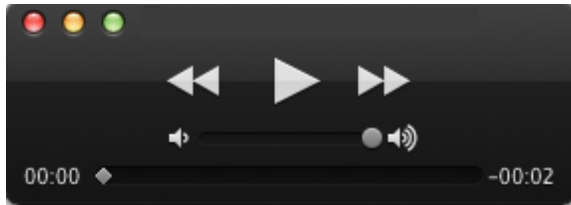

Audio 1. Wing hum of a hovering female Costa's Hummingbird, recorded in the X direction at  $r = 0.15$  m.

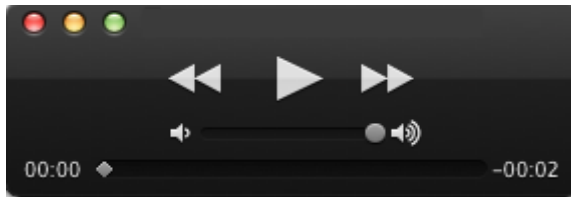

Audio 2. Wing hum of a hovering female Costa's Hummingbird hovering at a feeder, recorded in the Y direction at  $r = 0.15$  m.

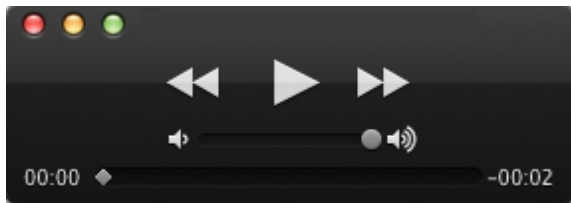

Audio 3. Wing hum of a hovering female Costa's Hummingbird hovering at a feeder, recorded in the Z direction at  $r = 0.21$  m.
